# Supplementary material for: Lactobacillus fermentum CECT5716 Supplementation in Rats during Pregnancy and Lactation Impacts Maternal and Offspring Lipid Profile, Immune System and Microbiota
Source: PubMed Central journal article supplement (PMC7140451; doi:10.3390/cells9030575), 2020-02-28
Supplement: cells-09-00575-s001.pdf [file cells-09-00575-s001.pdf]

**Supplementary Table S1.** Assessment of the matrix effect on the quantification of immunoglobulins by ELISA.

|                         | <b>IgM</b> |             | <b>IgG</b> |            | <b>IgA</b> |             |
|-------------------------|------------|-------------|------------|------------|------------|-------------|
|                         | dilution   | % recovery  | dilution   | % recovery | dilution   | % recovery  |
| <b>Fecal homogenate</b> | -          | -           | -          | -          | 1/10       | 82.1 ± 0.7  |
| <b>GW (dams)</b>        | 1/10       | 99.1 ± 1.1  | 1/500      | 89.8 ± 2.6 | 1/100      | 93.8 ± 13.0 |
| <b>GW (pups)</b>        | 1/30       | 98.7 ± 5.6  | 1/2000     | 93.3 ± 2.7 | 1/200      | 105.3 ± 0.8 |
| <b>MLN homogenate</b>   | 1/20       | 98.4 ± 4.9  | -          | -          | 1/80       | 90.0 ± 2.0  |
| <b>SMG homogenate</b>   | 1/10       | 88.3 ± 11.3 | -          | -          | 1/40       | 102.4 ± 5.8 |

A spike recovery test was performed to investigate if the concentration-response relationship was similar in the calibration curve using the kit diluent and using each of the sample diluent. Samples were spiked with three different concentrations of the standard within the linear part of the calibration curve. The percentage of recovery was calculated as: (Measured concentration of the spiked sample – Measured concentration of the neat sample)/(Theoretical concentration of the spike) × 100. Results are expressed as mean ± S.E.M. Gut wash (GW), immunoglobulin (Ig), mesenteric lymph nodes (MLNs) and submaxillary gland (SMG).
